# Supplementary material for: Modulated emission from dark triplet excitons in aza-acene compounds: fluorescence versus phosphorescence
Source: Royal Society of Chemistry journal article supplement (doi:10.1039/c6nj02747d), 2017-01-01
Supplement: c6nj02747d1.pdf [file c6nj02747d1.pdf]

## Electronic supplementary information

### **Modulated Emission from Dark Triplet Excitons in Aza-Acene Compounds: Fluorescence Versus Phosphorescence**

*Jianwei Chen,<sup>ab,†</sup> Yi Chen,<sup>c,†</sup> Yishi Wu<sup>\*a</sup>, Xuedong Wang,<sup>ab</sup> Zhenyi Yu,<sup>ab</sup> Lu Xiao,<sup>ab</sup> Yanping Liu,<sup>ab</sup> He Tian<sup>\*c</sup>, Jiannian Yao<sup>a</sup> and Hongbing Fu<sup>\*ad</sup>*

<sup>a</sup> Beijing National Laboratory for Molecular Sciences (BNLMS), Institute of Chemistry, Chinese Academy of Sciences, Beijing, 100190, P. R. China

<sup>b</sup> University of Chinese Academy of Sciences, Beijing, 100039, P. R. China

<sup>c</sup> Key Laboratory for Advanced Materials and Institute of Fine Chemicals, East China University of Science & Technology, Shanghai 200237, P. R. China

<sup>d</sup> Department of Chemistry, Capital Normal University, Beijing, 100048, P. R. China

E-mail: [hongbing.fu@iccas.ac.cn](mailto:hongbing.fu@iccas.ac.cn); [yswu@iccas.ac.cn](mailto:yswu@iccas.ac.cn); [tianhe@ecust.edu.cn](mailto:tianhe@ecust.edu.cn)

## 1. Synthesis and Compounds Data

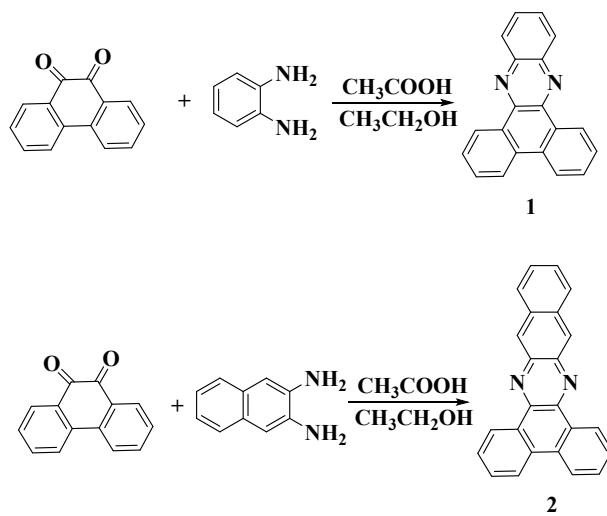

**Scheme S1.** Synthetic pathway of the BP compounds.

### Dibenzo[a,c]phenazine (1).

To a round bottom flask were added the phenanthrene-9,10-dione (1.04 g, 5 mmol), benzene-1,2-diamine (0.60 g, 5.5 mmol), acetic acid (20 ml) and ethyl alcohol (40 ml). The reaction was heated and refluxed for 3h. After cooling to room temperature, the mixture was filtered under vacuum and washed with ethyl alcohol. The solid was dried under vacuum for 20 h, affording the faint yellow procedure **1** (1.34 g). Yield: 86 %.

<sup>1</sup>H NMR (400 MHz, CDCl<sub>3</sub>) δ 9.40 (dd, *J* = 8.0, 1.2 Hz, 2H), 8.56 (d, *J* = 8.0 Hz, 2H), 8.35 – 8.29 (m, 2H), 7.86 (dt, *J* = 6.4, 3.2 Hz, 2H), 7.77 (tdd, *J* = 15.2, 10.4, 4.0 Hz, 4H). <sup>13</sup>C NMR (400 MHz, CDCl<sub>3</sub>) δ 122.94, 126.30, 127.96, 129.48, 129.77, 130.33, 132.09, 142.23, 142.49. HRMS: calcd. for C<sub>20</sub>H<sub>12</sub>N<sub>2</sub> [M+H]<sup>+</sup> 281.1079; found 281.1059.

### Tribenzo[a,c,i]phenazine (2).

To a round bottom flask were added the phenanthrene-9,10-dione (1.04 g, 5 mmol), naphthalene-2,3-diamine (0.87 g, 5.5 mmol), acetic acid (20 ml) and ethyl alcohol (40 ml). The reaction was heated and refluxed for 3h. After cooling to room temperature, the mixture was filtered under vacuum and washed with ethyl alcohol. The solid was dried under vacuum for 20 h, affording the faint yellow procedure **2** (1.67 g). Yield: 82 %.

<sup>1</sup>H NMR (400 MHz, CDCl<sub>3</sub>) δ 9.43 (dd, *J* = 8.0, 1.2 Hz, 2H), 8.94 (s, 2H), 8.53 (d, *J* = 7.6 Hz, 2H), 8.20 (dd, *J* = 6.4, 3.2 Hz, 2H), 7.79 (tdd, *J* = 15.2, 10.4, 4.4 Hz, 4H), 7.60 (dd, *J* = 6.4, 3.2 Hz, 2H). <sup>13</sup>C NMR (400 MHz, CDCl<sub>3</sub>) δ 123.07, 126.56, 127.49, 128.17, 128.56, 132.43, 133.23, 134.09. HRMS: calcd. for C<sub>24</sub>H<sub>14</sub>N<sub>2</sub> [M+H]<sup>+</sup> 331.1235; found 331.1233.

## 2. Spectral Characterization and Photophysical Parameters

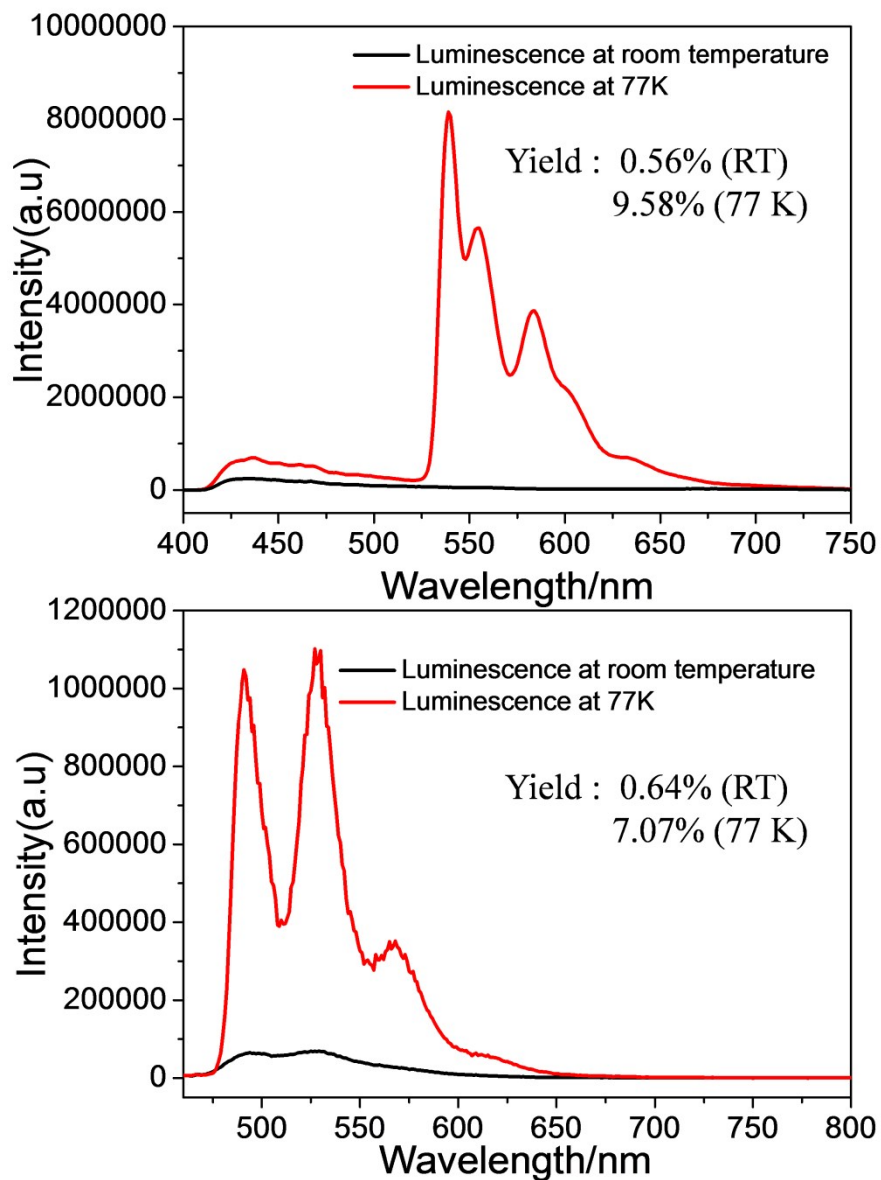

**Fig. S1** Luminescence spectra at room temperature (black line) and at 77 K (red line) of DBP (up) and TBP (bottom) in Toluene (Tol) dilute solution, respectively. The absolute quantum yields were also presented at RT (room temperature) and 77 K.

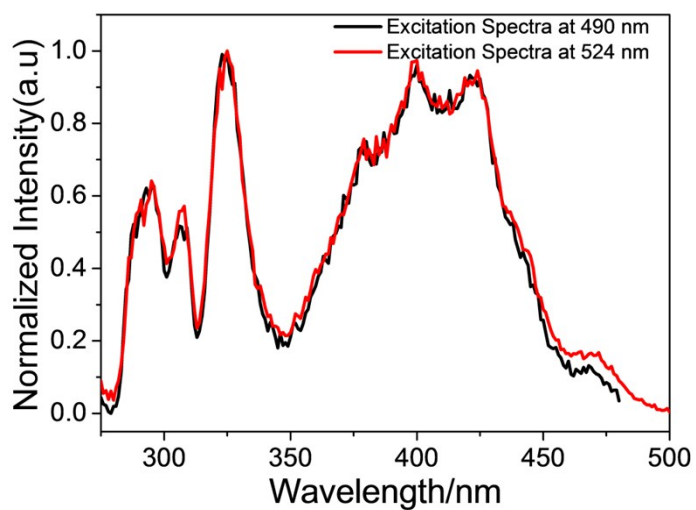

**Fig. S2** Excitation spectra for TBP at 490 nm (black line) and 524 nm (red line), respectively.

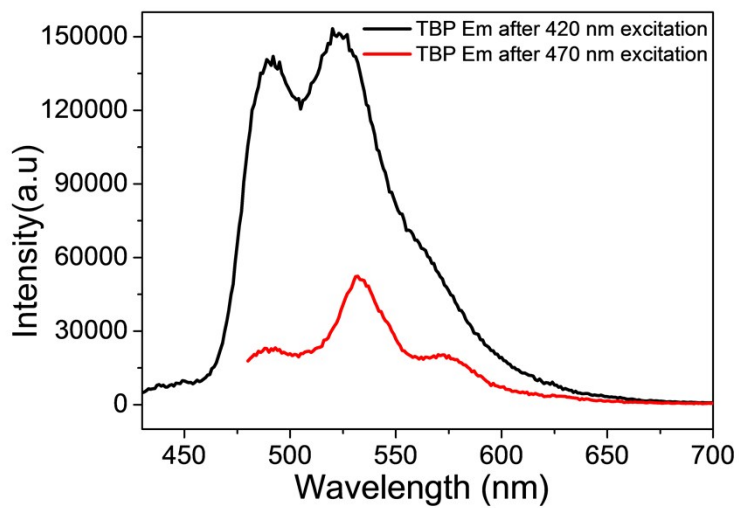

**Fig. S3** Emission spectra for TDP in Tol dilute solution with excitation wavelength of 420 nm (black line) and 470 nm (red line), respectively.

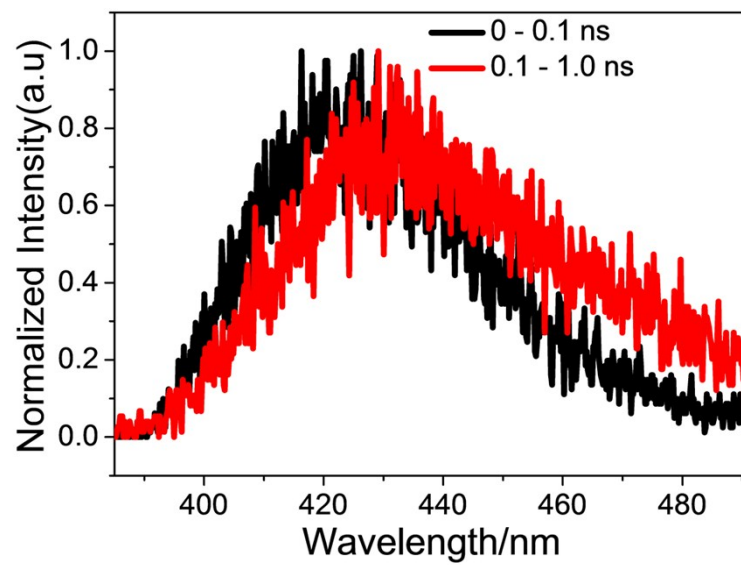

**Fig. S4** Time-resolved fluorescence spectra for DBP at room-temperature integrated over 0 – 0.1 ns and 0.1 – 1.0 ns, respectively.

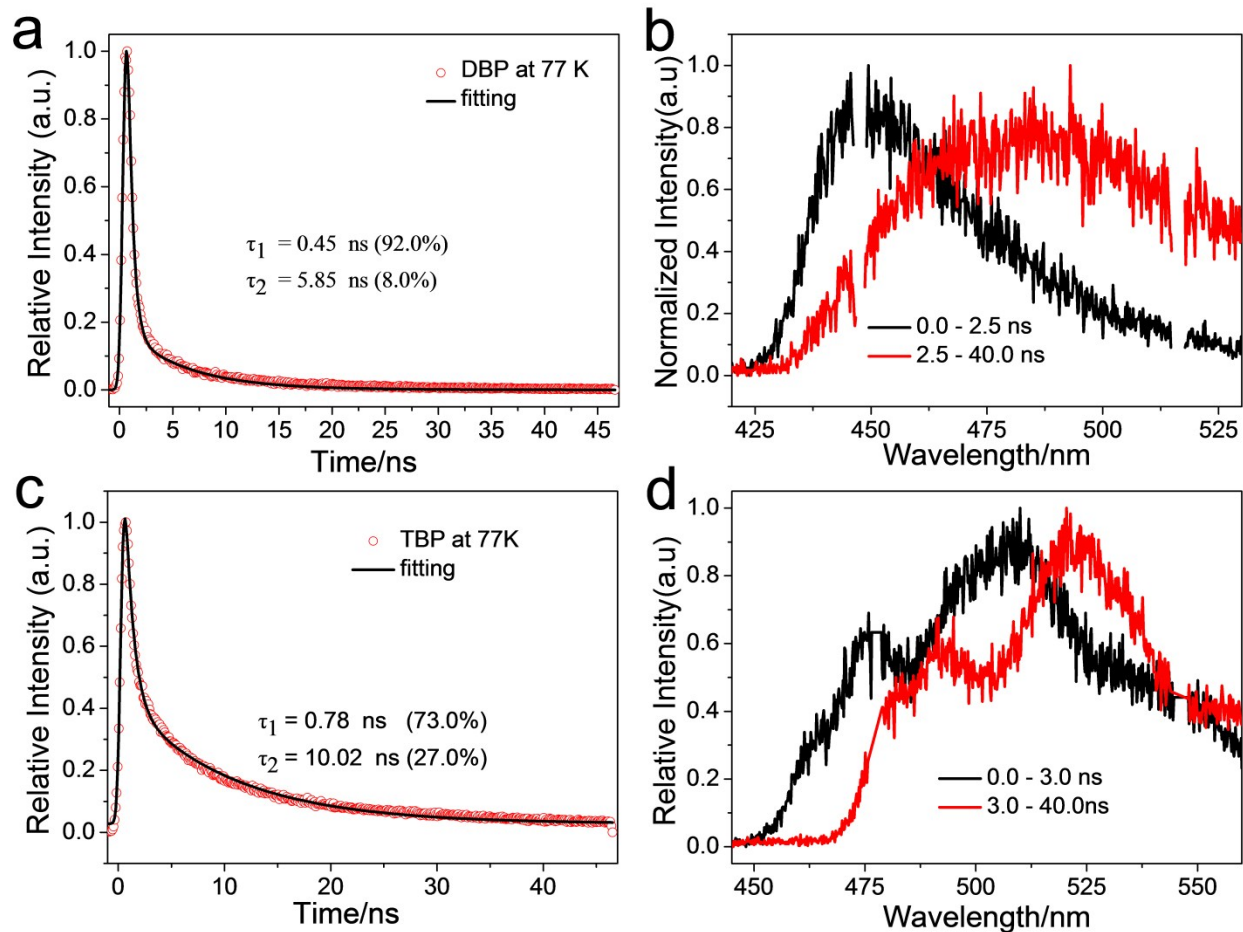

**Fig. S5** Time-resolved fluorescence spectra decay transient of (a) DBT and (c) TBT in Tol dilute solution at 77 K with excitation wavelength of 400nm. (b) (d) represent the time-resolved fluorescence spectra for DBP and TBP at 77 K, respectively.

**Nanosecond flash photolysis.** The nanosecond flash photolysis system is based on the same mechanism as the femtosecond ultrafast transient absorption system. The THF output (355 nm) of the Nd:YAG laser (Continuum Surelite II, 7 ns fwhm) was used for pump pulse and the white light provided by a xenon arc lamp was used for the probe pulse. Samples in Tol solution (in a 1.0 cm quartz cell) were placed at the crossing point of the pump pulse and the probe pulse. The signals were detected by the Edinburgh LP920 and recorded on the Tektronix TDS 3012B oscilloscope and computer.

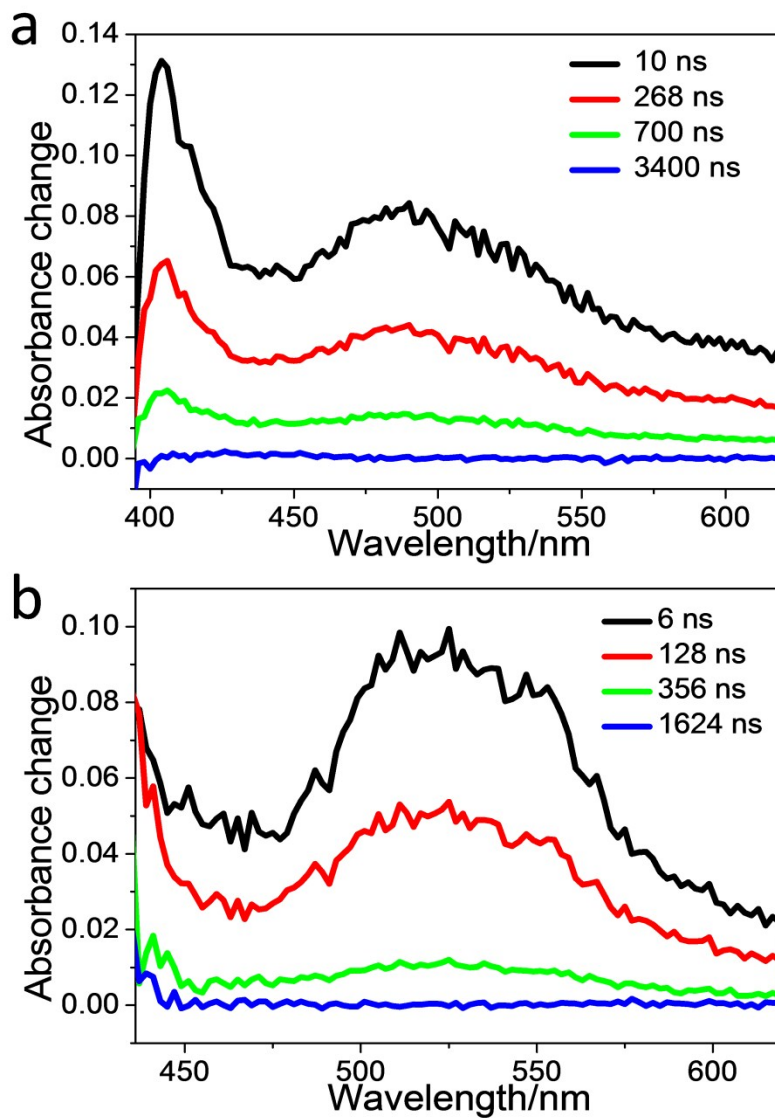

**Fig. S6** (a) The nanosecond transient absorption spectra of DBP and (b) TBP in N<sub>2</sub>-saturated Tol solutions using flash photolysis method upon excitation with 355 nm laser pulse at room temperature.



### 3. Computational data

**Table S1** The calculated energy levels and the corresponding symmetry for the excited singlet and triplet states of DBP at b3lyp/6-311<sup>++</sup>g<sup>\*\*</sup> level.

| Excited State | Singlet State |          |        | Triplet State |          | $\Delta E(T_n-S_1)$ |
|---------------|---------------|----------|--------|---------------|----------|---------------------|
|               | energy/ ev    | symmetry | $f$    | energy/ ev    | symmetry |                     |
| 1             | 3.1878        | B2       | 0.0182 | 2.2811        | B1       |                     |
| 2             | 3.2565        | B1       | 0.0012 | 2.4375        | A1       |                     |
| 3             | 3.4060        | A1       | 0.2410 | 2.6132        | B1       |                     |
| 4             | 3.6199        | B2       | 0.0012 | 2.7349        | B2       |                     |
| 5             | 4.1930        | A1       | 0.1578 | 3.1104        | B2       | -0.0774             |
| 6             |               |          |        | 3.4555        | B2       | 0.2677              |
| 7             |               |          |        | 3.5883        | A1       | 0.4005              |

**Table S2** The calculated energy levels and the corresponding symmetry for the excited singlet and triplet states of TBP at b3lyp/6-311<sup>++</sup>g<sup>\*\*</sup> level.

| Excited State | Singlet State |          |        | Triplet State |          | $\Delta E(T_n-S_1)$ |
|---------------|---------------|----------|--------|---------------|----------|---------------------|
|               | energy/ ev    | symmetry | $f$    | energy/ ev    | symmetry |                     |
| 1             | 2.5406        | B2       | 0.0152 | 1.4818        | B2       |                     |
| 2             | 3.0147        | B1       | 0.0009 | 2.1894        | A1       |                     |
| 3             | 3.0745        | B2       | 0.0076 | 2.3276        | B1       |                     |
| 4             | 3.1387        | A1       | 0.2877 | 2.3383        | B2       | -0.2023             |
| 5             | 3.7998        | B2       | 0.0041 | 2.6581        | B2       | 0.1175              |
| 6             | 3.9451        | A1       | 0.7955 | 3.0054        | B2       | 0.4648              |
| 7             |               |          |        | 3.0882        | A1       | 0.5476              |
| 8             |               |          |        | 3.1396        | B2       | 0.5990              |
| 9             |               |          |        | 3.2898        | B2       | 0.7492              |
| 10            |               |          |        | 3.3761        | A1       | 0.8355              |
| 11            |               |          |        | 3.4879        | B2       | 0.9473              |
| 12            |               |          |        | 3.5404        | A2       | 0.9998              |
| 13            |               |          |        | 3.6887        | A1       | 1.1481              |
| 14            |               |          |        | 3.8911        | A1       | 1.3505              |
| 15            |               |          |        | 3.8976        | B2       | 1.3570              |
| 16            |               |          |        | 3.9572        | B2       | 1.4166              |
